# Supplementary material for: A New Fungal Triterpene from the Fungus Aspergillus flavus Stimulates Glucose Uptake without Fat Accumulation
Source: MDPI journal article supplement (doi:10.3390/md20030203), 2022-03-10
Supplement: s1 [file s1]

# A new fungal triterpene from the fungus *Aspergillus flavus* stimulates glucose uptake without fat accumulation

Dan-dan Li<sup>1</sup>, Ying Wang<sup>1</sup>, Eun La Kim<sup>1</sup>, Jongki Hong<sup>2</sup> and Jee H. Jung<sup>1,\*</sup>

<sup>1</sup>College of Pharmacy, Pusan National University, 46241 Busan, Republic of Korea; 18840659614@163.com (D.-D.L.); 15521334275@163.com (Y.W.); eunlakim@gmail.com (E.L.K.); jhjung@pusan.ac.kr (J.H.J.)

<sup>2</sup>College of Pharmacy, Kyung Hee University, 02447 Seoul, Republic of Korea; jhong@khu.ac.kr (J.H.)

\*Correspondence: jhjung@pusan.ac.kr (J.H.J)

## Supplementary Experimental Section

6,8-Dihydroxy-3-((1*E*,3*E*)-penta-1,3-dien-1-yl) isochroman-1-one (**2**): 2.4 mg. <sup>1</sup>H NMR (500 MHz, CD<sub>3</sub>OD): δ 6.40, (dd, J = 15.2, 10.5 Hz, 1H), δ 6.23 (s, 1H), δ 6.20 (d, J = 1.9 Hz, 1H), δ 6.15-6.08 (m, 1H), δ 5.84 (dq, J = 13.6, 6.7 Hz, 1H), δ 5.70 (dd, J = 15.3, 6.9 Hz, 1H), δ 5.06 (dt, J = 12.4, 6.2 Hz, 1H), δ 3.02-2.91 (m, 2H), δ 1.78 (d, J = 6.4 Hz, 3H). <sup>13</sup>C NMR (100 MHz, CD<sub>3</sub>OD): δ 171.40, 166.50, 165.51, 143.10, 135.36, 133.04, 131.62, 127.59, 108.09, 102.27, 101.56, 80.73, 34.36, 18.25.

1-(4-Hydroxy-2-methoxyphenyl)-1-propanone (**3**): 1.74 mg. <sup>1</sup>H NMR (500 MHz, CD<sub>3</sub>OD): δ 7.60-7.56 (m, 1H), δ 7.55 (s, 1H), δ 6.86 (d, J = 8.2 Hz, 1H), δ 3.92 (s, 3H), δ 3.00 (q, J = 7.3 Hz, 2H), δ 1.18 (t, J = 7.3 Hz, 3H) ppm. <sup>13</sup>C NMR (100 MHz, CD<sub>3</sub>OD): δ 201.01, 152.23, 147.97, 129.04, 123.17, 114.49, 110.44, 55.10, 30.09, 8.44.

Phomapyrone C (**4**): 1.56 mg.  $[\alpha]_D^{26} = +8.4$  (1 mg/mL, MeOH). <sup>1</sup>H NMR (500 MHz, CD<sub>3</sub>OD): δ 5.95 (s, 1H), δ 2.51-2.43 (m, 1H), δ 1.85 (s, 3H), δ 1.69 (dt, J = 14.6, 7.5 Hz, 1H), δ 1.56 (dq, J = 13.7, 6.9 Hz, 1H), δ 1.21 (d, J = 6.9 Hz, 3H), δ 0.90 (t, J = 7.4 Hz,

3H) ppm.  $^{13}\text{C}$  NMR (100 MHz,  $\text{CD}_3\text{OD}$ ):  $\delta$  171, 170.0, 167.0, 101.65, 98.0, 40.88, 28.54, 18.27, 11.85, 8.29.

Daidzein (**5**): 2.87 mg.  $^1\text{H}$  NMR (500 MHz,  $\text{CD}_3\text{OD}$ ):  $\delta$  8.10 (s, 1H),  $\delta$  8.02 (d,  $J$  = 8.8 Hz, 1H),  $\delta$  7.39-7.35 (m, 2H),  $\delta$  6.90 (dd,  $J$  = 8.9, 2.2 Hz, 1H),  $\delta$  6.86-6.84 (m, 2H),  $\delta$  6.78 (d,  $J$  = 2.2 Hz, 1H) ppm.  $^{13}\text{C}$  NMR (100 MHz,  $\text{CD}_3\text{OD}$ ):  $\delta$  174, 164, 157, 152, 129, 127, 124, 123, 116, 115, 114, 101.

Genistein (**6**): 5.65 mg.  $^1\text{H}$  NMR (500 MHz,  $\text{CD}_3\text{OD}$ ):  $\delta$  8.04 (s, 1H),  $\delta$  7.37 (d,  $J$  = 8.1 Hz, 2H),  $\delta$  6.84 (d,  $J$  = 8.1 Hz, 2H),  $\delta$  6.33 (d,  $J$  = 2.2 Hz, 1H), 6.22 (d,  $J$  = 2.0 Hz, 1H) ppm.  $^{13}\text{C}$  NMR (100 MHz,  $\text{CD}_3\text{OD}$ ):  $\delta$  182.26, 165.95, 163.87, 159.73, 158.83, 154.80, 131.38, 124.75, 123.30, 116.26, 106.29, 100.11, 94.76.

(*S*)-(+)-1-(4-Hydroxy-2,6-dimethoxy-3,5-dimethylphenyl)-2-methylbutan-1-one (**7**): 1.04 mg.  $[\alpha]_D^{26}$  = +0.94 (1 mg/mL, MeOH).  $^1\text{H}$  NMR (500 MHz,  $\text{CD}_3\text{OD}$ ):  $\delta$  3.65 (s, 6H),  $\delta$  2.93 (td,  $J$  = 7.1, 6.0 Hz, 1H),  $\delta$  2.11 (s, 6H),  $\delta$  1.76 (dq,  $J$  = 13.5, 7.5, 5.9 Hz, 1H),  $\delta$  1.42-1.32 (m, 1H),  $\delta$  1.10 (d,  $J$  = 7.0 Hz, 3H),  $\delta$  0.93 (t,  $J$  = 7.4 Hz, 3H) ppm.  $^{13}\text{C}$  NMR (100 MHz,  $\text{CD}_3\text{OD}$ ):  $\delta$  211, 157, 155, 123, 115, 62.8, 50.3, 26.45, 15.72, 11.94, 9.29.

1-Acetyl- $\beta$ -carboline (**8**): 0.66 mg.  $^1\text{H}$  NMR (500 MHz,  $\text{CD}_3\text{OD}$ ):  $\delta$  8.48 (d,  $J$  = 4.9 Hz, 1H),  $\delta$  8.33 (d,  $J$  = 4.9 Hz, 1H),  $\delta$  8.24 (d,  $J$  = 7.9 Hz, 1H),  $\delta$  7.72 (d,  $J$  = 8.3 Hz, 1H),  $\delta$  7.61 (t,  $J$  = 7.7 Hz, 1H),  $\delta$  7.33 (t,  $J$  = 7.5 Hz, 1H),  $\delta$  2.84 (s, 3H) ppm.  $^{13}\text{C}$  NMR (100 MHz,  $\text{CD}_3\text{OD}$ ):  $\delta$  203.19, 143.38, 138.63, 137.21, 136.12, 133.16, 130.30, 122.65, 121.61, 120.19, 113.48, 26.06.

MK800-62F1 (**9**): 2.7 mg.  $^1\text{H}$  NMR (500 MHz,  $\text{CD}_3\text{OD}$ ):  $\delta$  5.22 (s, 1H),  $\delta$  4.26 (d,  $J$  = 7.5 Hz, 1H),  $\delta$  4.12 (d,  $J$  = 11.1 Hz, 1H),  $\delta$  3.89-3.83 (m, 1H),  $\delta$  3.76 (d,  $J$  = 3.6 Hz, 1H),  $\delta$  3.63 (dd,  $J$  = 9.3, 7.5 Hz, 1H),  $\delta$  3.54 (d,  $J$  = 3.2 Hz, 1H),  $\delta$  3.53-3.48 (m, 2H),  $\delta$  3.41 (d,  $J$  = 11.1 Hz, 1H),  $\delta$  3.38-3.32 (m, 3H),  $\delta$  2.19 (dd,  $J$  = 13.7, 4.2 Hz, 1H),  $\delta$  1.98-1.86 (m, 5H),  $\delta$  1.83-1.74 (m, 1H),  $\delta$  1.72-1.53 (m, 5H),  $\delta$  1.48-1.33 (m, 2H),  $\delta$  1.22 (s, 3H),  $\delta$  1.19 (s, 3H),  $\delta$  1.18-1.14 (m, 1H),  $\delta$  1.08-0.97 (m overlap, 3H),  $\delta$  1.04 (s,

3H),  $\delta$  1.02 (s, 3H),  $\delta$  1.01 (s, 3H),  $\delta$  0.97 (s, 3H),  $\delta$  0.95 (s, 3H),  $\delta$  0.89 (d,  $J$  = 11.9 Hz, 2H).  $^{13}\text{C}$  NMR (100 MHz,  $\text{CD}_3\text{OD}$ ):  $\delta$  145.09, 123.53, 108.79, 93.00, 81.24, 76.89, 75.32, 73.88, 70.18, 67.68, 65.29, 57.18, 49.09, 48.01, 45.29, 43.55, 42.73, 41.22, 40.00, 39.68, 37.82, 37.15, 34.01, 31.31, 28.74, 28.61, 27.34, 27.01, 24.86, 23.22, 23.20, 21.24, 19.8, 17.34, 16.5.

Sigmoside C (**10**): 1.5 mg.  $^1\text{H}$  NMR (500 MHz,  $\text{CD}_3\text{OD}$ ):  $\delta$  5.24 (t,  $J$  = 3.6 Hz, 1H),  $\delta$  4.55 (s, 1H),  $\delta$  4.13 (d,  $J$  = 11.0 Hz, 1H),  $\delta$  3.87 (dd,  $J$  = 11.8, 2.4 Hz, 1H),  $\delta$  3.80 (d,  $J$  = 3.2, 1H),  $\delta$  3.74 (dd,  $J$  = 11.7, 5.5 Hz, 1H),  $\delta$  3.58-3.53 (m, 2H),  $\delta$  3.46 (dd,  $J$  = 9.4, 3.3 Hz, 1H),  $\delta$  3.40 (d,  $J$  = 11.1 Hz, 1H),  $\delta$  3.38-3.31 (m overlap, 1H),  $\delta$  3.18 (ddd,  $J$  = 9.8, 5.6, 2.5 Hz, 1H),  $\delta$  2.22 (d,  $J$  = 13.3 Hz, 1H),  $\delta$  1.94-1.90 (m, 2H),  $\delta$  1.87-1.76 (m, 4H),  $\delta$  1.71-1.65 (m, 3H),  $\delta$  1.63-1.53 (m, 3H),  $\delta$  1.47-1.37 (m, 3H),  $\delta$  1.22 (s, 3H),  $\delta$  1.17 (s, 3H),  $\delta$  1.05 (s, 3H),  $\delta$  1.01 (s, 3H),  $\delta$  1.06-0.97 (m overlap, 3H),  $\delta$  0.97 (s, 3H),  $\delta$  0.96 (s, 3H),  $\delta$  0.92 (s, 3H),  $\delta$  0.90-0.87 (m, 1H).  $^{13}\text{C}$  NMR (100 MHz,  $\text{CD}_3\text{OD}$ ):  $\delta$  145.72, 123.26, 98.57, 82.33, 81.26, 78.22, 75.66, 73.10, 68.83, 65.31, 62.93, 57.24, 49.2, 47.45, 46.16, 43.57, 43.05, 41.06, 39.73, 38.17, 37.85, 37.22, 34.28, 33.66, 31.39, 28.8, 28.5, 28.37, 27.10, 26.35, 24.84, 23.21, 21.50, 19.81, 17.47, 16.55.

Prosapogenol (**11**): 0.95 mg.  $^1\text{H}$  NMR (500 MHz,  $\text{CD}_3\text{OD}$ ):  $\delta$  5.22 (q,  $J$  = 3.5 Hz, 1H),  $\delta$  4.49-4.45 (m, 1H),  $\delta$  4.32 (d,  $J$  = 7.8 Hz, 1H),  $\delta$  4.13 (d,  $J$  = 11.1 Hz, 1H),  $\delta$  3.96 (d,  $J$  = 3.2 Hz, 1H),  $\delta$  3.90-3.83 (m, 2H),  $\delta$  3.80-3.74 (m, 1H),  $\delta$  3.61 (d,  $J$  = 3.1 Hz, 1H),  $\delta$  3.54-3.49 (m, 3H),  $\delta$  3.41 (d,  $J$  = 11.1 Hz, 1H),  $\delta$  3.38-3.28 (m overlap, 3H),  $\delta$  3.22 (t,  $J$  = 10.8 Hz, 1H),  $\delta$  2.18 (d,  $J$  = 15.2 Hz, 1H),  $\delta$  1.98-1.84 (m, 5H),  $\delta$  1.79 (q,  $J$  = 11.9 Hz, 1H),  $\delta$  1.68 (d,  $J$  = 13.0 Hz, 3H),  $\delta$  1.65-1.52 (m, 3H),  $\delta$  1.45 (t,  $J$  = 12.6 Hz, 1H),  $\delta$  1.40-1.29 (m, 3H),  $\delta$  1.22 (d,  $J$  = 1.7 Hz, 3H),  $\delta$  1.19 (s, 3H),  $\delta$  1.18-1.14 (m, 2H),  $\delta$  1.04 (s, 3H),  $\delta$  1.02 (s, 3H),  $\delta$  1.01 (s, 3H),  $\delta$  0.97 (d,  $J$  = 1.9 Hz, 3H),  $\delta$  0.95 (s, 3H), 0.94 (s, 1H), 0.89 (d,  $J$  = 11.5 Hz, 1H).  $^{13}\text{C}$  NMR (100 MHz,  $\text{CD}_3\text{OD}$ ):  $\delta$  145.05, 123.55, 108.58, 106.51, 93.79, 85.10, 81.21, 77.72, 77.52, 76.95, 75.22, 72.88, 71.06, 69.88, 67.22, 66.97, 65.29, 57.16, 49.0, 48.0, 45.26, 43.54, 42.71, 41.22, 39.98, 39.67, 37.81, 37.19, 33.99, 31.33, 28.61, 28.34, 27.34, 27.03, 24.85, 23.27, 23.22, 21.16, 19.8, 17.34, 16.49.

## Supplementary Results

### Primer Information

| Sequencing Primer Name | Primer Sequences                | PCR Primer Name | Primer Sequences                |
|------------------------|---------------------------------|-----------------|---------------------------------|
| ITS1 5'                | (TCC GTA GGT GAA CCT GCG G) 3'  | ITS1 5'         | (TCC GTA GGT GAA CCT GCG G) 3'  |
| ITS4 5'                | (TCC TCC GCT TAT TGA TAT GC) 3' | ITS4 5'         | (TCC TCC GCT TAT TGA TAT GC) 3' |

| Subject    |                    |        |       |     |          | Score |         | Identities  |         |
|------------|--------------------|--------|-------|-----|----------|-------|---------|-------------|---------|
| Accession  | Description        | Length | Start | End | Coverage | Bit   | E-Value | Match/Total | Pct.(%) |
| KY234273.1 | Aspergillus flavus | 819    | 4     | 815 | 99       | 1188  | 0.0     | 767/823     | 93      |

| Kingdom   | Family | Genus       | Species            |
|-----------|--------|-------------|--------------------|
| Eukaryota | -      | Aspergillus | Aspergillus flavus |

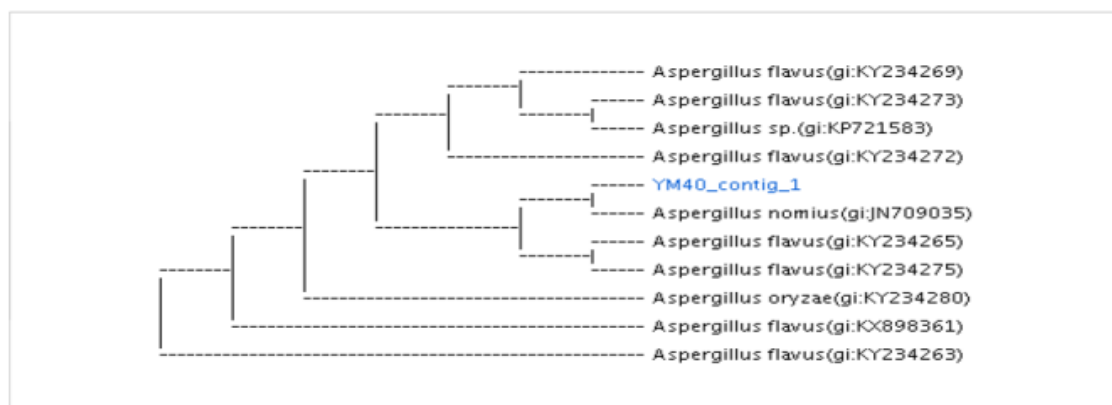

Figure S1: The fungus *Aspergillus flavus* was identified by ITS gene sequences (GenBank accession no. KY234273.1).

| Elemental composition | Theoretical m/z | Observed m/z | Error (ppm) |
|-----------------------|-----------------|--------------|-------------|
| $C_{31}H_{49}O_7$     | 533.3478        | 533.3484     | +1.13       |

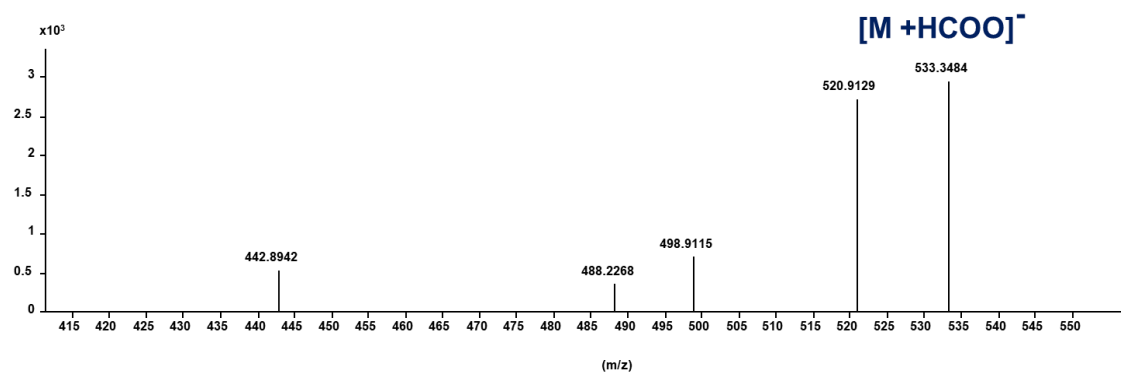

Figure S2: The HRESI mass spectrum of compound **1** measured in negative ion mode.

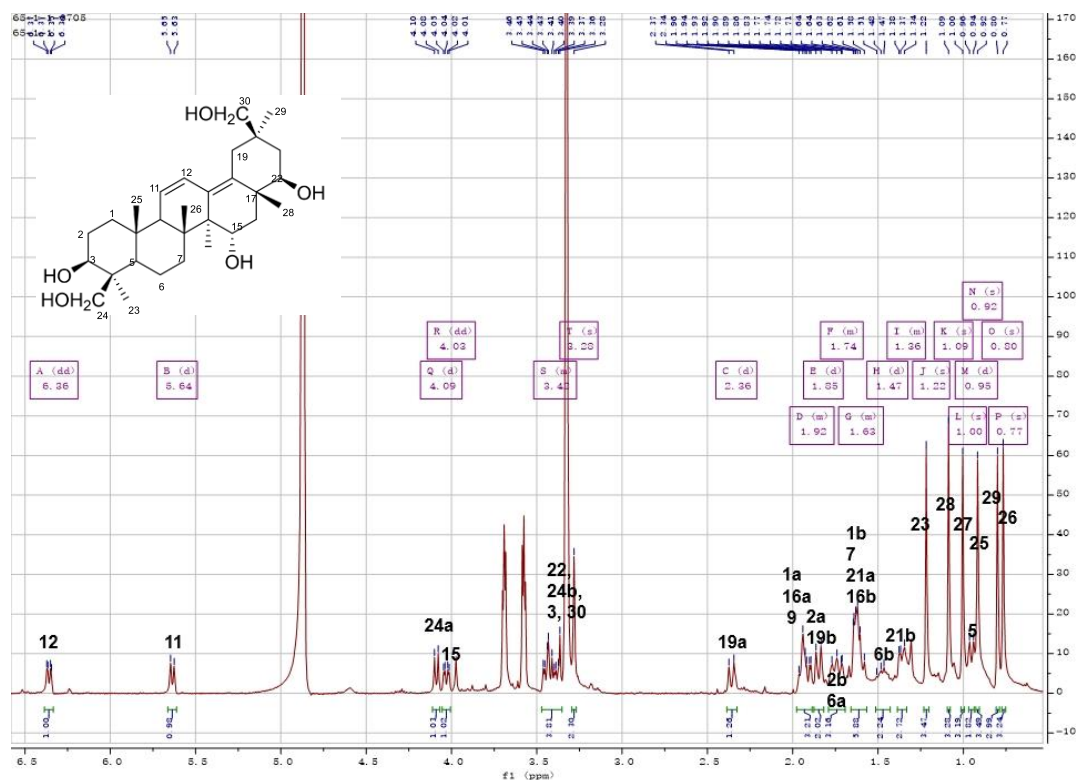

Figure S3: The proton NMR spectrum of compound **1** (500 MHz, CD<sub>3</sub>OD). The impurity peaks ( $\delta$  3.6 and  $\delta$  3.7 in <sup>1</sup>H NMR spectrum, and  $\delta$  62 and  $\delta$  73 in <sup>13</sup>C NMR spectrum) would come from the NMR solvent and appeared in every spectrum. We cannot identify the impurity. The impurity appeared in every spectrum but the bioactivity of tested compounds were quite different to each other. Therefore, we believe that the impurity comes only from NMR solvent and it would not affect the bioassay results

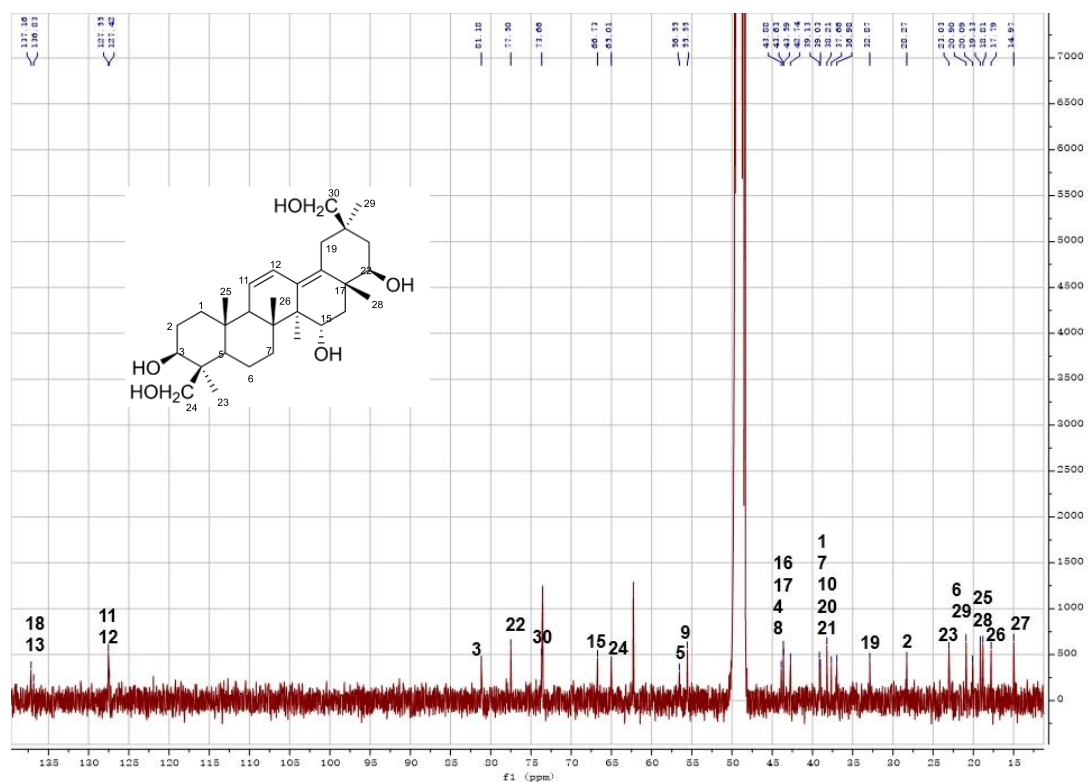

Figure S4: The  $^{13}\text{C}$  NMR spectrum of compound **1** (100 MHz,  $\text{CD}_3\text{OD}$ ).

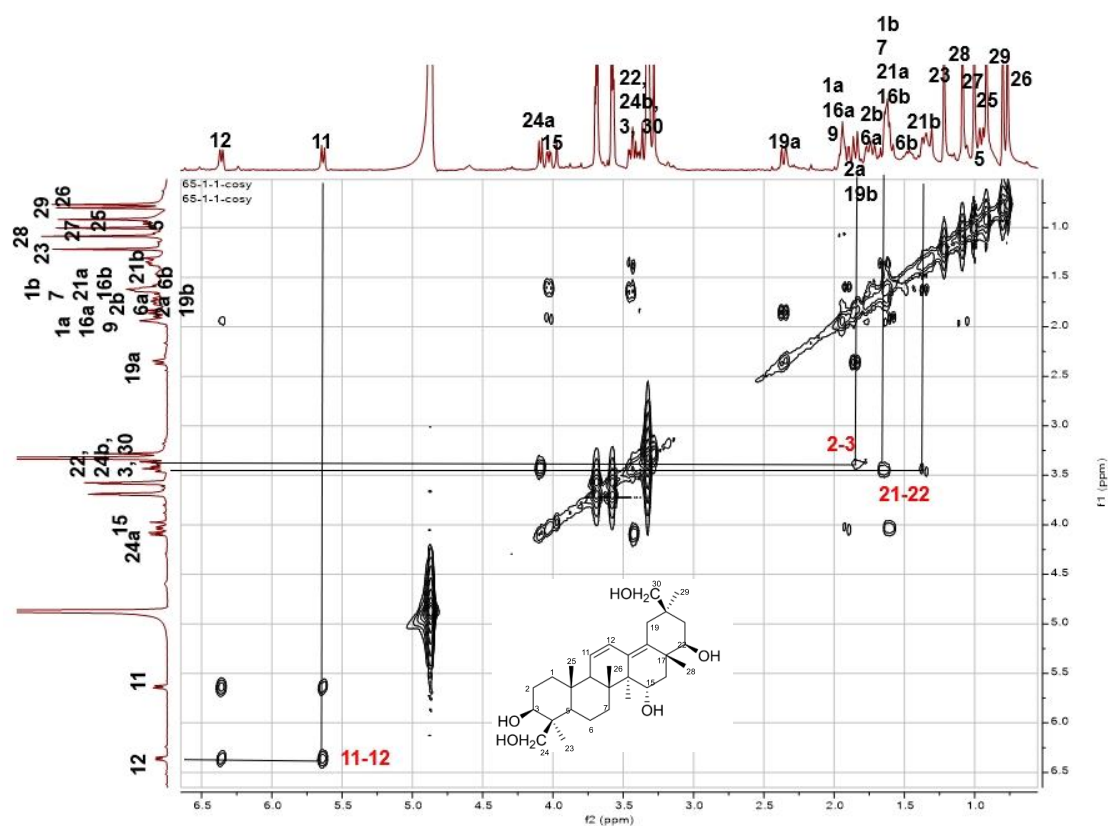

Figure S5: The COSY spectrum of compound **1** (500 MHz,  $\text{CD}_3\text{OD}$ ).



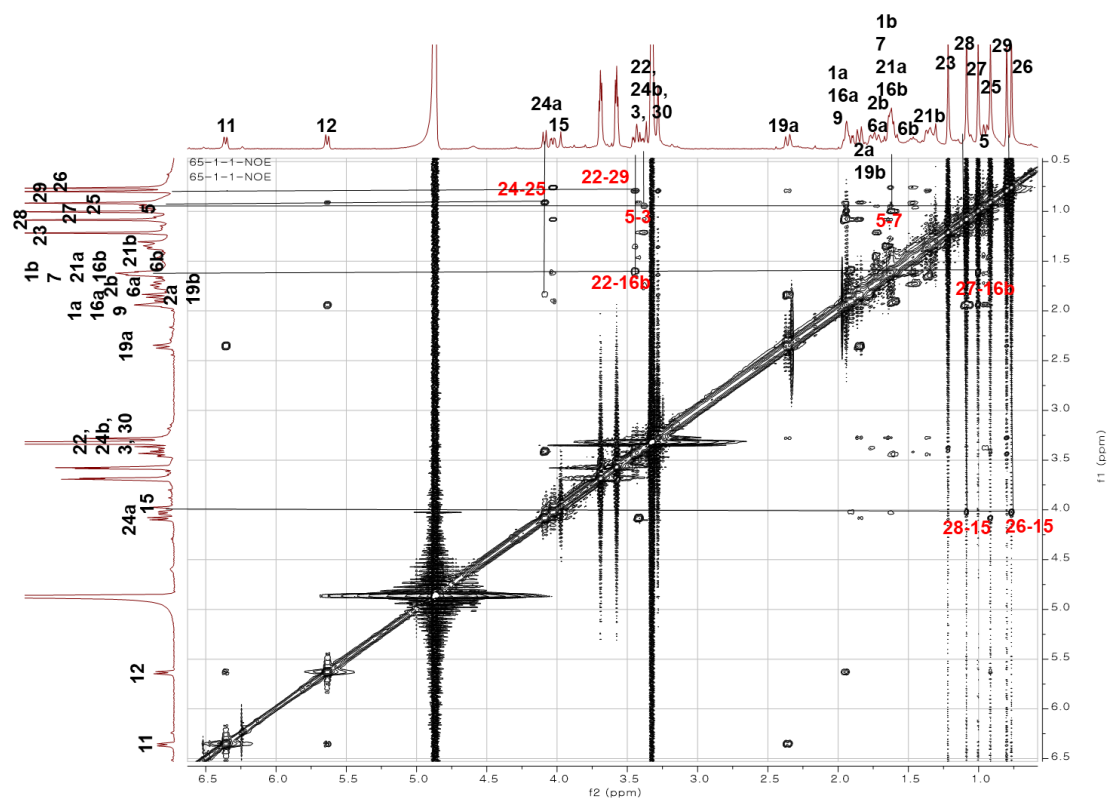

Figure S8: The NOESY spectrum of compound **1** (500 MHz, CD<sub>3</sub>OD).

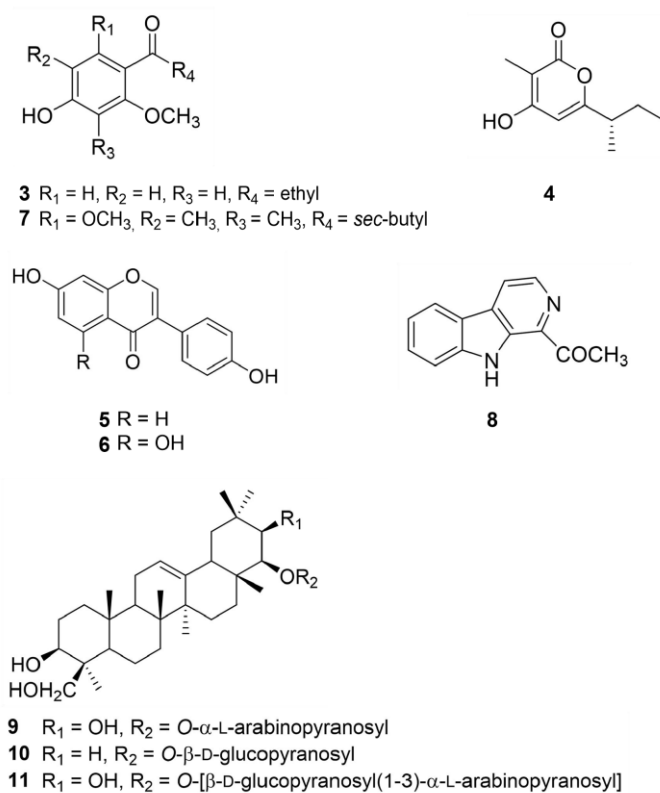

Figure S9. Compounds isolated from the jellyfish-derived fungus *Aspergillus flavus* by activity-guided fractionation.



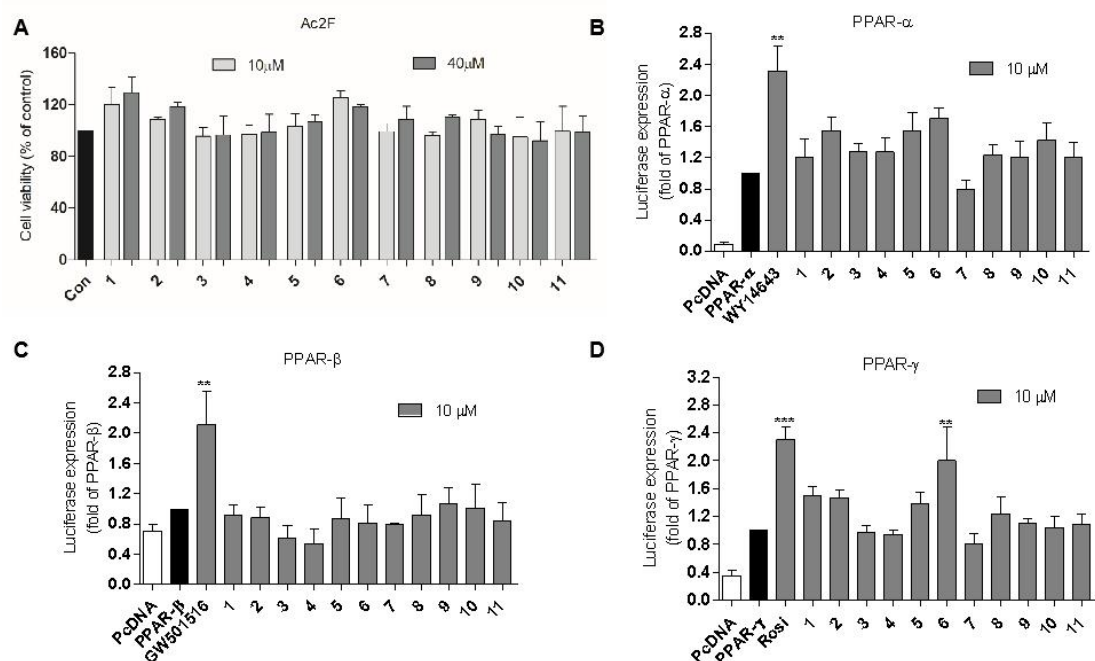

Figure S10: Transactivation effects of PPAR- $\alpha$ , - $\beta/\delta$ , and - $\gamma$  in Ac2F cells when treated with the compounds. (A) Viability of Ac2F cells when treated with the compounds for 12 h. Control group was added only the media and shown as a black bar. (B) The transactivation effect of PPAR- $\alpha$  when treated with the compounds (C) The transactivation effect of PPAR- $\beta/\delta$  when treated with the compounds (D) The transactivation effect of PPAR- $\gamma$  when treated with the compounds. WY-14643, GW501516, and rosiglitazone were used as positive controls for PPAR- $\alpha$ , - $\beta/\delta$ , and - $\gamma$ , respectively. The cells transfected with PcDNA were employed as blank group and shown as empty bars. The cells transfected with PPAR- $\alpha$ , - $\beta/\delta$ , - $\gamma$  and PPARE were employed as control and were shown as black bars. \*\* $P < 0.01$ , \*\*\* $P < 0.001$  vs. PPAR- $\alpha$ , - $\beta/\delta$  or - $\gamma$ .
